# Supplementary material
Source: publisher site journal article supplement (https://www.dovepress.com/article/299562)
Supplement: Supplementary file 1 [file get_supplementary_file.php]

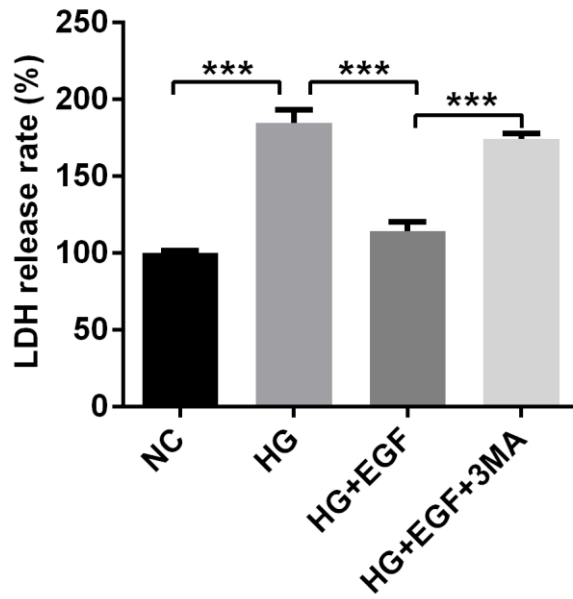

**Supplemental Figure S1** LDH released rate was measured by LDH release Assay Kit. N = 3; significant differences among treatment groups were shown as \*\*\*P < 0.001.

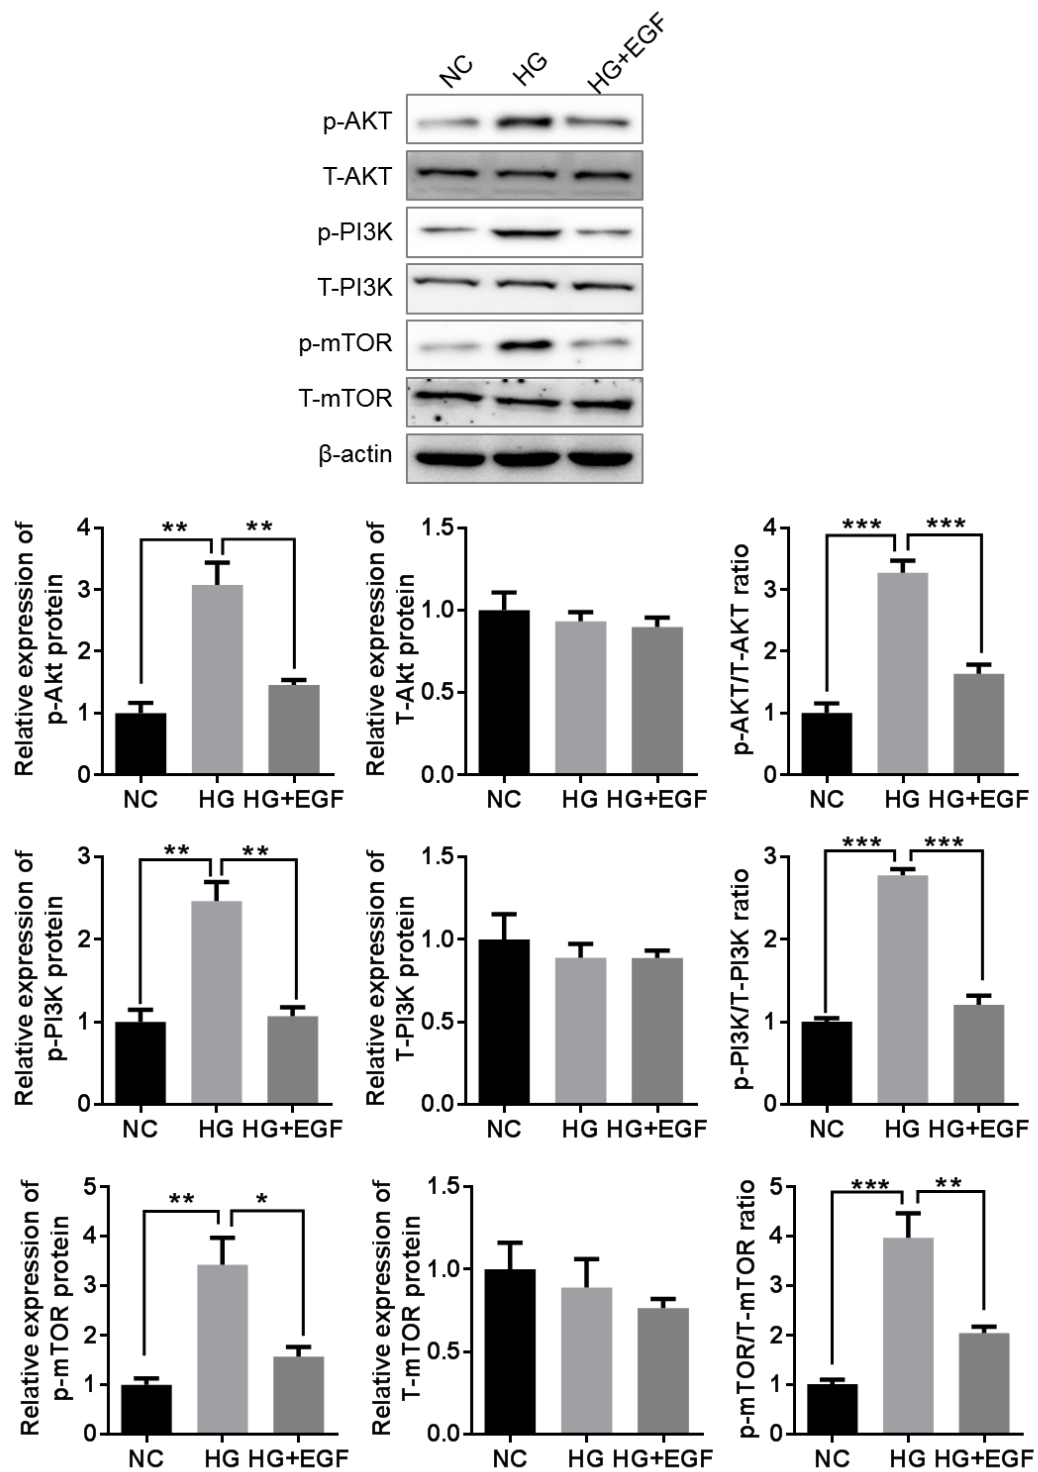

**Supplemental Figure S2** Effect of on the phosphorylated and total protein levels of PI3K, AKT and mTOR in HG-induced human podocytes. N = 3; significant differences among treatment groups were shown as \*P < 0.05, \*\*P < 0.01, \*\*\*P < 0.001.
